# Supplementary material
Source: PubMed Central journal article supplement (PMC3307952)
Supplement: NIHMS352371-supplement-supplement_1.pdf [file NIHMS352371-supplement-supplement_1.pdf]

**Supplemental Figure 1. FACS plot to confirm the specificity of antibodies.** (A) Representative cell population analyzed. (B) Bone marrow cells were stained with anti mouse APC (Sca1), PE-Cy7 (c-Kit), FITC (LinCD41CD48) and PE (CD150) (C) PCa cells stained with anti mouse APC (Sca1), PE-Cy7 (c-Kit), FITC (LinCD41CD48) and PE (CD150) (D) PCa cells or bone marrow cells stained with anti human APC (Human Leukocyte Antigen - HLA) or FITC (HLA).

**Supplemental Figure 2. Representative distribution of various hematopoietic stem cell populations by FACS.** (A)  $CD150^+ Lin^- CD48^- CD41^- Sca-1^+ cKit^+$  (SLAM HSC) (B)  $Lin^- CD48^- CD41^- Sca-1^+ cKit^+$  (LSK HSC).

**Supplemental Fig.3 (A)** Images of monolayer cultures incubated in osteogenic media for 2 weeks stained with Alizarin Red, showing substantial staining in the rhBMP2 group compared to media control group and compared to BMSCs co-cultured with PCa cells.

**(B).** Representative microscopic fields of osteoclast formation. RAW264.7 cells were co-cultured in the presence of RANKL (20 ng/ml), PC3, C4-2B or non metastatic control cells for 4 days and stained for TRAP.

**Supplemental Fig.4 (A)** Representative microscopic fields for osteoblast (OB) formation *in vivo*. Arrow head shows endosteal osteoblasts in H& E stained marrow. **(B)** Osteoclast (OC) formation *in vivo*. Arrow head shows TRAP positive osteoclasts. Original magnification, 60x. Bar 50  $\mu\text{m}$  **(C)** Quantification of OB and OC formation *in vivo*. Number of OB and OC remain unchanged in the presence of PCa.

**Supplemental Table 1. Representative PCR cycle number for the genes analyzed.** mRNA expression was normalized to the house keeping gene GAPDH.
